# Supplementary material for: CHEK2 Pathogenic Variants in Greek Breast Cancer Patients: Evidence for Strong Associations with Estrogen Receptor Positivity, Overuse of Risk-Reducing Procedures and Population Founder Effects
Source: MDPI journal article supplement (doi:10.3390/cancers13092106), 2021-04-27
Supplement: s1 [file s1]

**Table S1.** Estimated allele frequencies of the microsatellite markers D22S1163, D22S689, D22S275 and D22S1150 flanking the *CHEK2* gene used for haplotype analysis.

| D22S1163 |           | D22S689 |           | D22S275 |           | D22S1150 |           |
|----------|-----------|---------|-----------|---------|-----------|----------|-----------|
| Allele   | Frequency | Allele  | Frequency | Allele  | Frequency | Allele   | Frequency |
| 141      | 0         | 202     | 0.067     | 158     | 0         | 213      | 0.019     |
| 143      | 0         | 206     | 0.019     | 160     | 0.028     | 215      | 0.057     |
| 145      | 0         | 210     | 0.134     | 162     | 0.163     | 217      | 0.038     |
| 147      | 0.201     | 214     | 0.201     | 164     | 0.144     | 219      | 0.192     |
| 149      | 0.269     | 218     | 0.211     | 166     | 0.201     | 221      | 0.038     |
| 151      | 0.230     | 222     | 0.048     | 168     | 0.259     | 223      | 0.451     |
| 153      | 0.115     | 226     | 0.019     | 170     | 0.096     | 225      | 0.028     |
| 155      | 0         |         |           | 172     | 0.009     | 227      | 0.019     |
| 157      | 0.105     |         |           | 174     | 0.076     | 229      | 0.038     |
| 159      | 0.076     |         |           | 176     | 0         | 231      | 0.028     |
| 161      | 0         |         |           | 178     | 0         | 233      | 0.057     |
| 163      | 0         |         |           | 180     | 0         | 235      | 0         |

**Table S2.** Haplotype analysis for microsatellite markers D22S1163, D22S689, D22S275 and D22S1150 in *CHEK2* c.499G>A carriers and non-carriers.

| Sample ID                             | D22S1163   | D22S689    | D22S275    | D22S1150   |
|---------------------------------------|------------|------------|------------|------------|
| F667                                  | 143/159    | 202/210    | 168/168    | 223/231    |
| F1326                                 | 143/149    | 210/210    | 168/168    | 223/223    |
| F2050                                 | 143/151    | 210/218    | 168/168    | 215/223    |
| F2050a                                | 143/151    | 210/218    | 168/170    | 219/223    |
| F2276                                 | N.A.       | N.A.       | N.A.       | N.A.       |
| F2469                                 | 143/159    | 210/214    | 166/168    | 223/233    |
| F2469b                                | 143/143    | 206/210    | 168/168    | 223/231    |
| F2605                                 | 143/151    | 210/218    | 162/168    | 223/229    |
| F2774                                 | 143/147    | 210/214    | 164/168    | 223/235    |
| F3445                                 | 143/153    | 210/214    | 168/168    | 223/233    |
| F3754                                 | N.A.       | N.A.       | N.A.       | N.A.       |
| <b>Common allele between carriers</b> | <b>143</b> | <b>210</b> | <b>168</b> | <b>223</b> |
| <b>Non-carriers</b>                   |            |            |            |            |
| F667a                                 | 141/143    | 202/222    | 166/168    | 219/231    |
| F667b                                 | 141/159    | 210/222    | 168/168    | 225/231    |
| F667c                                 | 151/159    | 202/206    | 160/168    | 231/233    |
| F2469a                                | 157/159    | 214/222    | 162/166    | 215/233    |
| F2605a                                | 151/157    | 218/222    | 162/162    | 219/229    |
| F2605b                                | 151/159    | 202/218    | 162/166    | 219/229    |
| F2774a                                | 143/151    | 214/214    | 166/166    | 225/235    |
| F3445a                                | 149/153    | 214/218    | 166/166    | 219/233    |
| F3445b                                | 151/153    | 206/214    | 166/168    | 219/233    |

\*Alleles segregating with the disease are highlighted in red.

**Table S3.** Haplotype analysis for microsatellite markers D22S1163, D22S689, D22S275 and D22S1150 in *CHEK2* c.549G>C carriers and non-carriers

| Sample ID                                     | D22S1163   | D22S689    | D22S275    | D22S1150   |
|-----------------------------------------------|------------|------------|------------|------------|
| F459                                          | 143/149    | 214/218    | 160/166    | 221/221    |
| F459a                                         | 143/147    | 206/218    | 166/172    | 221/221    |
| F498                                          | 143/159    | 214/218    | 166/170    | 213/221    |
| F498a                                         | 143/149    | 214/218    | 166/170    | 219/221    |
| F1018                                         | 143/149    | 210/218    | 164/166    | 221/233    |
| F1327                                         | 143/143    | 218/222    | 166/166    | 215/221    |
| <b>Common allele<br/>between<br/>carriers</b> | <b>143</b> | <b>218</b> | <b>166</b> | <b>221</b> |
| <b>Non-carriers</b>                           |            |            |            |            |
| 459b                                          | 149/159    | 210/218    | 160/162    | 223/223    |
| 459c                                          | 149/151    | 214/214    | 160/168    | 223/223    |
| 498b                                          | 151/157    | 214/214    | 170/170    | 213/219    |

\*Alleles segregating with the disease are highlighted in red.

**Table S4.** Haplotype analysis for microsatellite markers D22S1163, D22S689, D22S275 and D22S1150 in *CHEK2* c.592+3A>T carriers and non-carriers

| Sample ID                                     | D22S1163   | D22S689    | D22S275    | D22S1150   |
|-----------------------------------------------|------------|------------|------------|------------|
| F1313                                         | 149/149    | 206/210    | 162/164    | 219/233    |
| F2482                                         | 149/149    | 206/210    | 162/170    | 219/219    |
| F3247                                         | 149/157    | 206/206    | 162/166    | 219/223    |
| F3710                                         | 149/151    | 206/206    | 162/170    | 219/219    |
| F3710a                                        | 149/151    | 206/206    | 162/162    | 219/219    |
| <b>Common allele<br/>between<br/>carriers</b> | <b>149</b> | <b>206</b> | <b>162</b> | <b>219</b> |
| <b>Non-carriers</b>                           |            |            |            |            |
| 2482a                                         | 143/149    | 210/218    | 170/166    | 219/219    |
| 2482b                                         | 151/153    | 210/218    | 162/168    | 219/233    |
| 2482c                                         | 149/147    | 210/210    | 162/170    | 219/223    |

\*Alleles segregating with the disease are highlighted in red.

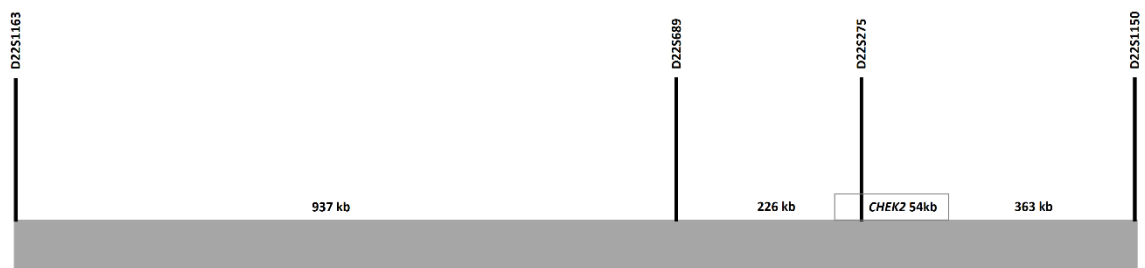

**Figure S1.** Physical map showing the microsatellite markers used for haplotype analysis relative to *CHEK2*, on chromosome 22.
